# Supplementary material for: Thermodynamics, morphology and molecular structure of molecular compounds in trisamide triarylamine organogels and pseudo-organogels
Source: Royal Society of Chemistry journal article supplement (doi:10.1039/d3sm00624g), 2023-01-01
Supplement: d3sm00624g1.pdf [file d3sm00624g1.pdf]

**THERMODYNAMICS, MORPHOLOGY AND MOLECULAR STRUCTURE  
OF MOLECULAR COMPOUNDS IN TRISAMIDE TRIARYLAMINE  
ORGANOGELES AND PSEUDO-ORGANOGELES**

Ganesh VISWANATHA-PILLAI, Andreas VARGAS-JENTZSCH, Alain CARVALHO, Guillaume  
FLEITH, Odile GAVAT, Emilie MOULIN, Nicolas GIUSEPPONE and Jean-Michel GUENET \*

Institut Charles Sadron  
CNRS-Université de Strasbourg  
23 rue du Loess, BP84047  
67034 STRASBOURG, Cedex2, France

Supplementary information

| structureII                                                                                             | $q_{\text{strucII}}$ | $d_{\text{strucII}}$ | $hk$ | Int | $q_{\text{tolu}}$ | $d_{\text{tolu}}$ | $d_{\text{calc}}$ | Lattice toluene C <sub>1</sub>                                                                      |
|---------------------------------------------------------------------------------------------------------|----------------------|----------------------|------|-----|-------------------|-------------------|-------------------|-----------------------------------------------------------------------------------------------------|
| $a = 3.47(5) \text{ nm}$<br>$b = 5.03(9) \text{ nm}$<br>$\gamma = 90^\circ$<br>$A = 17.51 \text{ nm}^2$ | 2.193                | 2.864                | 11   | VS  | 1.97              | 3.189             | 3.2               | $a = 3.66(5) \text{ nm}$<br>$b = 6.5 \text{ nm}$<br>$\gamma = 90^\circ$<br>$A = 24.16 \text{ nm}^2$ |
|                                                                                                         | 3.619                | 1.736                | 20   | S   | 3.43              | 1.831             | 1.831             |                                                                                                     |
|                                                                                                         | 4.388                | 1.432                | 22   | S   | 3.95              | 1.59              | 1.6               |                                                                                                     |
|                                                                                                         |                      |                      | 06   | VW  | 5.589             | 1.12              | 1.08              |                                                                                                     |
|                                                                                                         | 6.588                | 0.954                | 33   | VW  | 5.89              | 1.066             | 1.066             |                                                                                                     |

**Table S1:** Experimental and calculated scattering vectors and spacings  $q_{\text{strucII}}$ ,  $d_{\text{strucII}}$ , from peak position of the structure II observed in the solid state<sup>SI</sup>, and of compound C<sub>1</sub> in toluene,  $q_{\text{tolu}}$ ,  $d_{\text{tolu}}$ ,  $d_{\text{cal}}$ . Signal intensity code: VS = very strong, S = strong, M = medium, W = weak, VW = very weak; ( $hk$ ) are the Miller indices of the reflections, for this structure  $h+k=2n$ ;  $a$ ,  $b$ ,  $\gamma$ ,  $A$ : lattice parameters and lattice area.

| $hk$ | Int | $q_{\text{tolu}}$ | $d_{\text{tolu}}$ | $d_{\text{calc}}$ | Lattice toluene C <sub>2</sub> et C <sub>3</sub>                                                   |
|------|-----|-------------------|-------------------|-------------------|----------------------------------------------------------------------------------------------------|
| 11   | VS  | 1.779             | 3.53              | 3.53              | $a = 3.72 \text{ nm}$<br>$b = 11.22 \text{ nm}$<br>$\gamma = 90^\circ$<br>$A = 41.74 \text{ nm}^2$ |
| 20   | S   | 3.375             | 1.86              | 1.86              |                                                                                                    |
| 22   | S   | 3.547             | 1.771             | 1.765             |                                                                                                    |
| 17?  | W   | 4.56              | 1.378             | 1.46              |                                                                                                    |
| 33   | W   | 5.31              | 1.183             | 1.176             |                                                                                                    |
| 28   | VW  | 5.769             | 1.089             | 1.11              |                                                                                                    |
| 44   | VW  | 7.085             | 0.887             | 0.8825            |                                                                                                    |

**Table S2:** Experimental scattering vectors and spacings  $q_{\text{tolu}}$ ,  $d_{\text{tolu}}$ , from the peak position of compound C<sub>2</sub> in toluene and calculated spacings  $d_{\text{cal}}$  from the proposed 2-D lattice. Signal intensity code: VS = very strong, S = strong, M = medium, W = weak, VW = very weak; ( $hk$ ) are the Miller indices of the reflections;  $a$ ,  $b$ ,  $\gamma$ ,  $A$ : lattice parameters and lattice area.

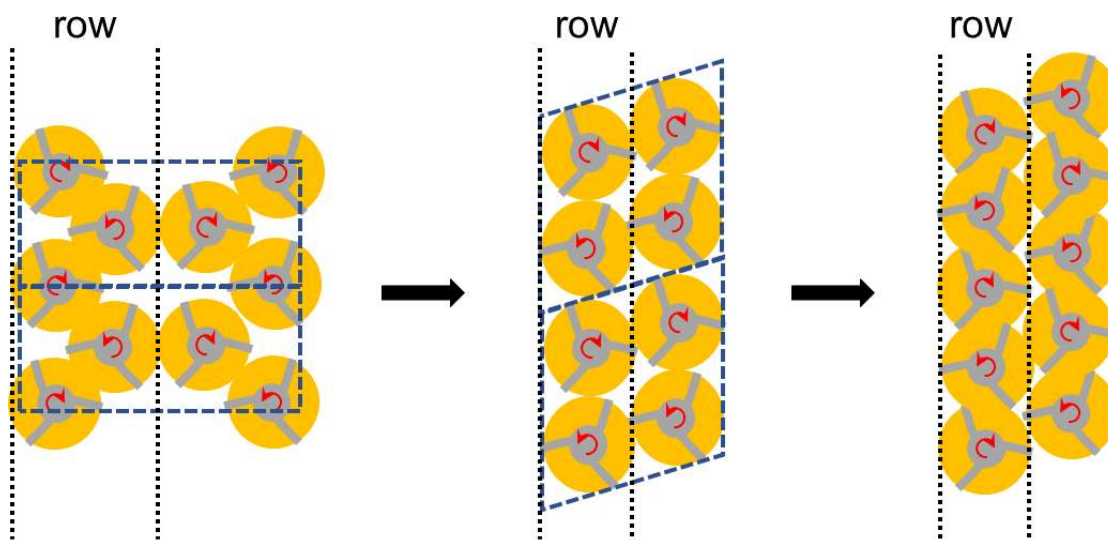

**Figure S1:** Schematic break down of the way TATA molecular compounds are liable to produce rows containing regularly-alternating right and left-handed helices. By shrinking the row the rhombohedral structure can be produced, where right and left helices alternate. This in turns gives adjacent, decorrelated rows, which entails the observation of only one diffraction peak arising from the intermolecular correlation within the rows.

|          |          |          |          |          |          |
|----------|----------|----------|----------|----------|----------|
| $d_{11}$ | $d_{21}$ | $d_{31}$ | $d_{41}$ | $d_{51}$ | $d_{61}$ |
| $d_{12}$ | $d_{22}$ | $d_{32}$ | $d_{42}$ | $d_{52}$ | $d_{62}$ |
| $d_{13}$ | $d_{23}$ | $d_{33}$ | $d_{43}$ | $d_{53}$ | $d_{66}$ |
| $d_{14}$ | $d_{24}$ | $d_{34}$ | $d_{44}$ | $d_{54}$ | $d_{64}$ |
| $d_{15}$ | $d_{25}$ | $d_{35}$ | $d_{45}$ | $d_{55}$ | $d_{65}$ |
| $d_{16}$ | $d_{26}$ | $d_{36}$ | $d_{46}$ | $d_{56}$ | $d_{66}$ |

**Figure S2:** Matrix for different spacing between cylinders  $d_{ij}$  in the intermolecular terms  $S(q)$  in the case of six cylinders arranged in a row (for details see text). The colours define diagonals corresponding to cylinders spaced apart by the same distance.

The intermolecular term for correlated cylinders is given by<sup>S2</sup>:

$$S(q) = \frac{1}{N^2} \left[ \sum_{i=1}^N \sum_{j=1}^N J_o(qd_{ij}) \right] \quad (1)$$

Where N is the number of cylinders.

The matrix shown in figure S1 illustrates the double sum of relation S1 when cylinders are arranged in a row. As is apparent, the  $d_{ij}$  in diagonals have the same value. By introducing  $kd$ , where k is an integer varying from 1 to N-1, and  $d$  the distance between two adjacent cylinders, equation S1 can be simply rewritten as a single sum through:

$$S(q) = \frac{1}{N^2} \left[ N + \sum_{k=1}^{N-1} 2(N-k) J_o(qkd) \right] \quad 2$$

The  $2(N-k)$  coefficients can be easily calculated for use in software such as Origin (see figure S3).

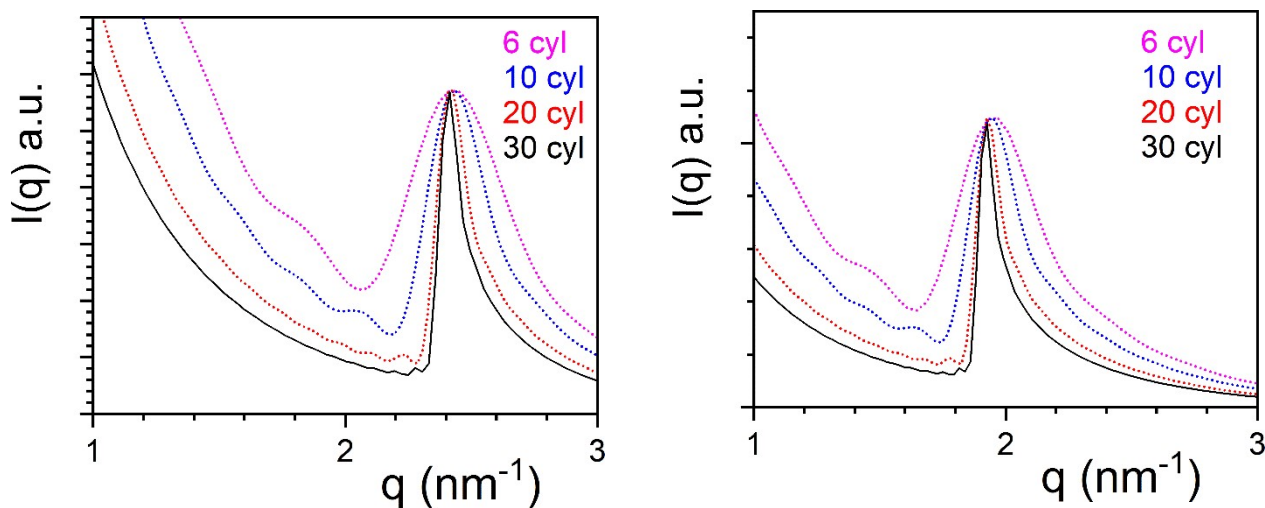

**Figure S3:** Evolution of the diffracted intensities for cylinders arranged in a row calculated from relation (2). As can be seen the peak narrows with increasing the number of cylinders with estimated FWHM of 0.39, 0.28, 0.13 and 0.1. **left)**  $d = 2.63 \text{ nm}$ ; **right)**  $d = 3.3 \text{ nm}$

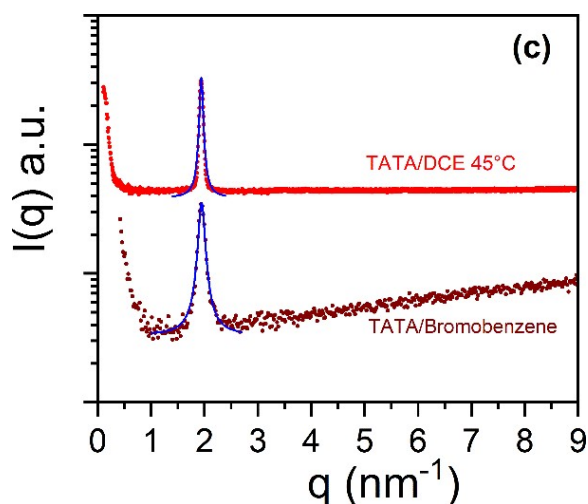

**Figure S4:** comparison of the diffraction patterns of TATA/DCE at  $T = 45^\circ\text{C}$  (red) and TATA/bromobenzene (brown), the latter from previous results<sup>S3</sup>. blue lines = fits with Lorentz functions.

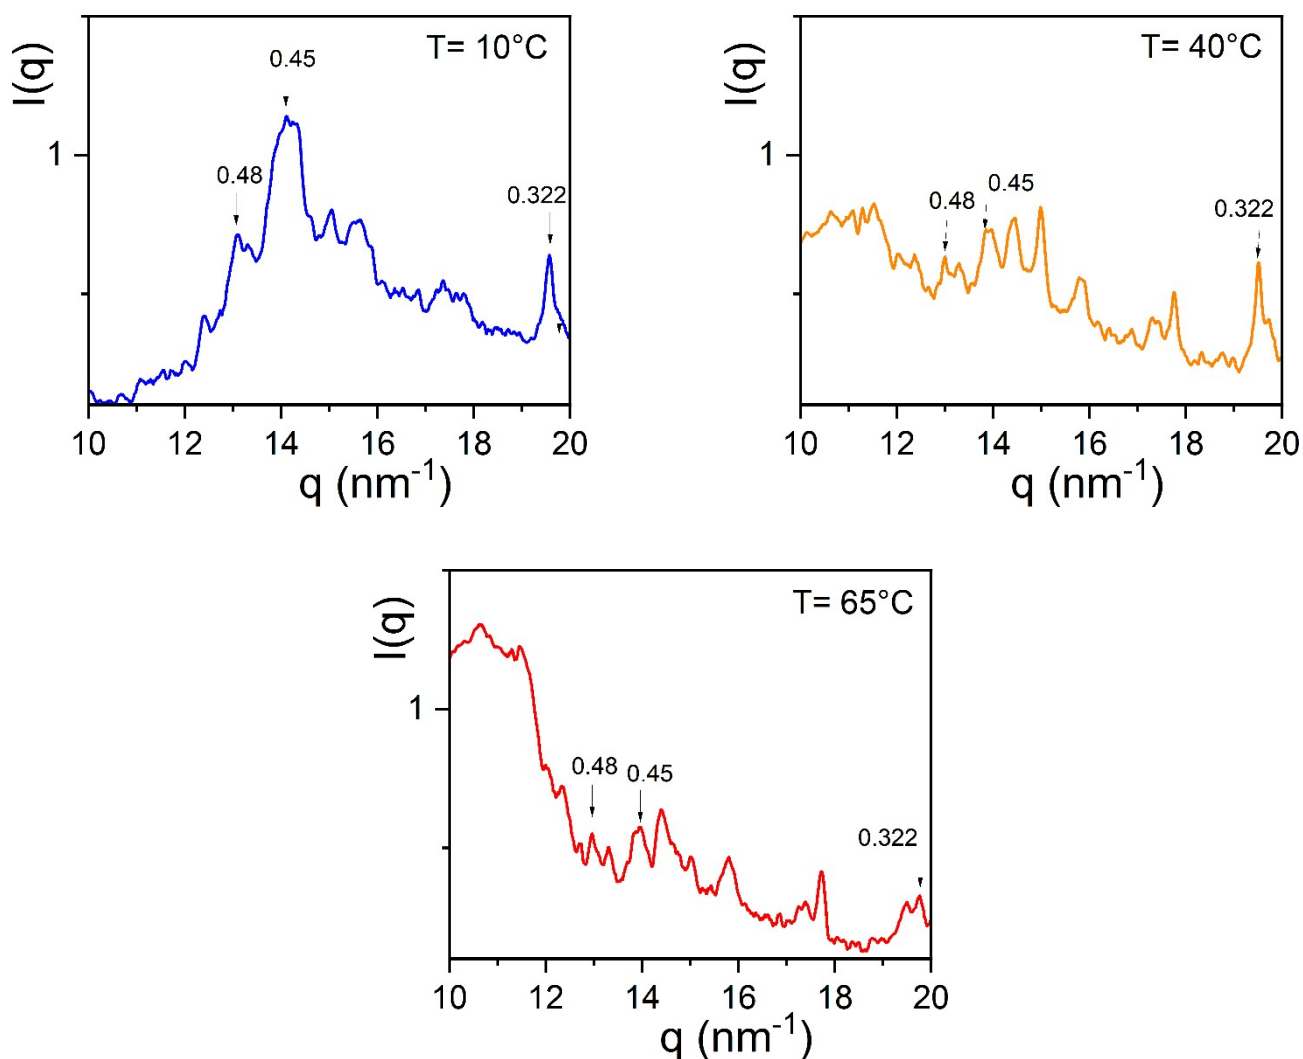

**Figure S6:** Wide angle X-ray scattering for TATA-Toluene at different temperatures (as indicated). The reflections at  $d = 0.48$  nm,  $0.45$  nm and  $0.32$  nm are typical from the TATA molecules piling<sup>S4</sup>. The distance  $0.48$  nm is associated with the N-N spacing of adjacent TATA molecules.

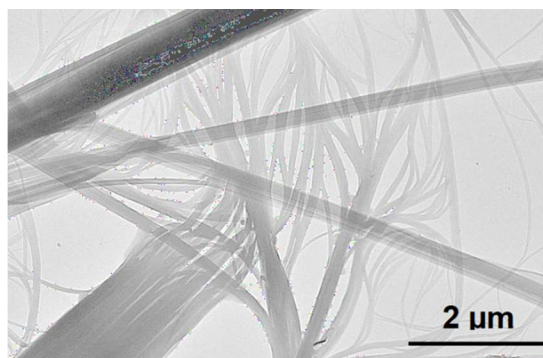

**Figure S6:** Observation by transmission electron microscopy from dilute systems in TCE. This picture highlights the peeling of the TATA larger fibrils thus forming smaller curved fibrils. The fraying allows random connections between fibrils, which gives a physically-cross-linked network.

## REFERENCES

- S1) P. Talebpour, B. Heinrich, O. Gavat, A. Carvalho, E. Moulin, N. Giuseppone, J.M. Guenet, Modulation of the Molecular Structure of Tri-aryl Amine Fibrils in Hybrid Poly[vinyl chloride] Gel/Organogel Systems *Macromolecules* **2021**, *54*, 8104
- S2) Oster, G., Riley, D.P. Scattering from Cylindrically Symmetric Systems *Acta Cryst.*, **1952**, *5*, 272
- S3) B. Kiflemariam, D. Collin, O. Gavat, A. Carvalho, E. Moulin, N. Giuseppone, J.M. Guenet, Hybrid materials from tri-aryl amine organogelators and poly[vinyl chloride] networks *Polymer*, **2020**, *207*, 122814
- S4) Armao IV, J.J.; Maaloum, M.; Ellis, T.; Fuks, G.; Rawiso, M.; Moulin, E.; Giuseppone, N. Healable supramolecular polymers as organic metals *J. Am. Chem. Soc.* **2014**, *136*, 11382
